# Supplementary material for: Cytokines TNFα, IFNγ and IL-2 Are Responsible for Signal Transmission from the Innate Immunity Protein Tag7 (PGLYRP1) to Cytotoxic Effector Lymphocytes
Source: PubMed Central journal article supplement (PMC7761954; doi:10.3390/cells9122602), 2020-12-04
Supplement: cells-09-02602-s001.pdf [file cells-09-02602-s001.pdf]

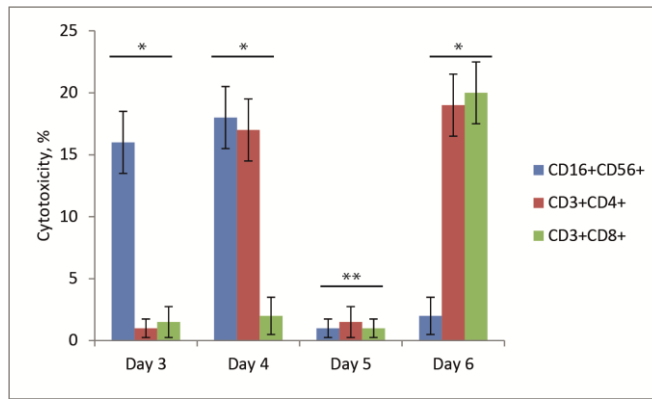

**Supplementary Fig. S1.** Changes in cytotoxic activity of different lymphocyte subpopulations induced in PBMC incubated with Tag7 ( $10^{-9}$ M) for different periods of time. Lymphocyte subpopulations were isolated by magnetic cell separation and tested for cytotoxicity against K562 cells. Data are presented as the mean  $\pm$  SD of 3 independent experiments. Differences from the control in all cases are significant at \*  $p < 0.03$ , \*\*  $p < 0.05$  (Student t test).

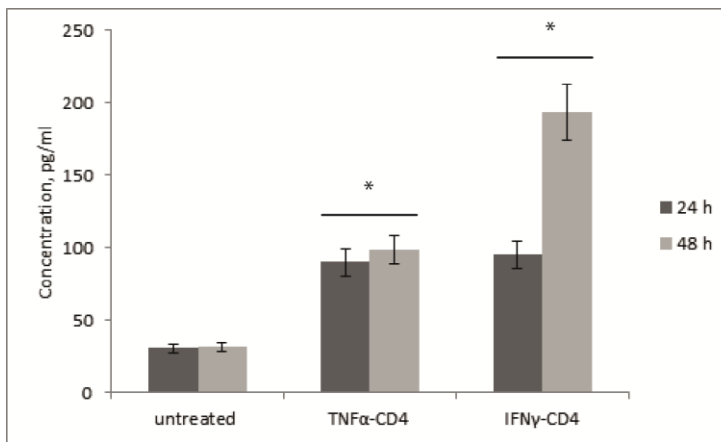

**Supplementary Fig. S2.** Secretion of IL-2 by CD3<sup>+</sup>CD4<sup>+</sup> - lymphocytes incubated with TNF $\alpha$  or IFN $\gamma$  for 24 and 48 hours. CD3<sup>+</sup>CD4<sup>+</sup> - lymphocytes were isolated by magnetic cell separation from PBMC on 0 day and treated with TNF $\alpha$  or IFN $\gamma$ . Conditioned medium from untreated lymphocytes was used as a control. The medium was sampled every 24 h to determine IL-2 level by ELISA. Data are presented as the mean  $\pm$  SD of 3 independent experiments. Differences from the control in all cases are significant at \*  $p < 0.05$  (2-way ANOVA).

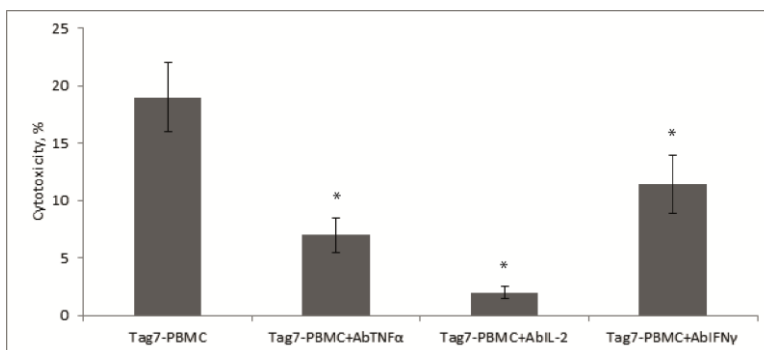

**Supplementary Fig. S3.** Cytotoxicity Tag7-PBMC in presence specific antibodies to TNF $\alpha$ , IFN $\gamma$ , IL-2. Each antibody (1:1000) was added to PBMC before 1h to Tag7 ( $10^{-9}$ M). After 6 days of incubation PBMC were tested for cytotoxicity against K562 cells. Data are presented as the mean  $\pm$  SD of 3 independent experiments. Differences from the control in all cases are significant at \*  $p < 0.05$  (Student t test).
